# Supplementary material for: The real-world outcomes of vedolizumab in patients with ulcerative colitis in Korea: a multicenter retrospective study
Source: PubMed Central journal article supplement — Ther Adv Gastroenterol. 2021 Jul 5;14:17562848211024769. doi: 10.1177/17562848211024769 (PMC8261845; doi:10.1177/17562848211024769), 2021-07-05
Supplement: sj-pdf-1-tag-10.1177_17562848211024769.pdf [file sj-pdf-1-tag-10.1177_17562848211024769.pdf]

## Supplementary Table

**Summary of definitions for clinical response and remission used in the GEMINI 1 study vs. this observational study.** The definition of clinical response in the GEMINI 1 trial vs. our real-world observational study was largely similar except that partial Mayo score was used in our study whereas the full Mayo score was used in the GEMINI 1. Previous studies suggested that full Mayo score and partial Mayo score are highly correlated and predictive of each other (reference below\*).

| Study      | Definition of clinical and endoscopic outcomes                                                                                                                                                                                                      |                                                                                      |
|------------|-----------------------------------------------------------------------------------------------------------------------------------------------------------------------------------------------------------------------------------------------------|--------------------------------------------------------------------------------------|
|            | Clinical Response                                                                                                                                                                                                                                   | Clinical Remission                                                                   |
| GEMINI 1   | A reduction in the <i>Mayo score</i> of at least 3 points and a decrease of at least 30% from the baseline score, with a decrease of at least 1 point on the rectal bleeding subscale or an absolute rectal bleeding score of 0 or 1.               | A <i>Mayo score</i> of 2 or lower and no subscore higher than 1                      |
| This Study | A reduction in the <i>partial Mayo score</i> of at least 3 points and a decrease of at least 30% from the baseline score, with a decrease of at least one point on the rectal bleeding subscore, or an absolute rectal bleeding subscore of 0 or 1. | A <i>partial Mayo score</i> of at most 2, without any subscore being greater than 1. |

\*Reference:

1. Lewis JD, Chuai S, Nessel L, Lichtenstein GR, Aberra FN, Ellenberg JH. Use of the noninvasive components of the Mayo score to assess clinical response in ulcerative colitis. *Inflamm Bowel Dis.* 2008;14(12):1660-1666. doi:10.1002/ibd.20520
2. Naegeli AN, Hunter T, Dong Y, Hoskin B, Middleton-Dalby C, Hetherington J, Stefani-Hunyady D, Canavan JB: Full, Partial, and Modified Permutations of the Mayo Score: Characterizing Clinical and Patient-Reported Outcomes in Ulcerative Colitis Patients. *Crohn's & Colitis* 360 2021, 3(1): otab007, <https://doi.org/10.1093/crocol/otab007>.
